# Supplementary material
Source: publisher figshare collection journal article supplement (https://acs.figshare.com/ndownloader/files/10044130)
Supplement: Supplementary file 1 [file 10044130]

## SUPPORTING INFORMATION

### Sustainable growth and lipid production from *Chlorella pyrenoidosa* using N-doped carbon nanosheets: Unravelling the role of Graphitic Nitrogen

Anwasha Khanra<sup>‡1</sup>, Sujata Sangam<sup>‡1</sup>, Adeeba Shakeel<sup>‡1</sup>, Deepa Suhag<sup>‡2</sup>, Subhradeep Mistry<sup>3</sup>, Monika Prakash Rai<sup>\*1</sup>, Sandip Chakrabarti<sup>\*4</sup>, Monalisa Mukherjee<sup>\*1,2</sup>

<sup>1</sup>Amity Institute of Biotechnology, Amity University Uttar Pradesh, Sector 125, Noida, India

<sup>2</sup>Amity Institute of Click Chemistry Research and Studies, Amity University Uttar Pradesh, Sector 125, Noida, India

<sup>3</sup>Framework Solid Lab, Solid State and Structural Chemistry Unit, Indian Institute of Science, Bangalore, India

<sup>4</sup>Amity Institute of Nanotechnology, Amity University Uttar Pradesh, Sector 125, Noida, India

<sup>‡</sup> These authors contributed equally to this work

<sup>\*</sup>Corresponding authors

#### ESI 1:

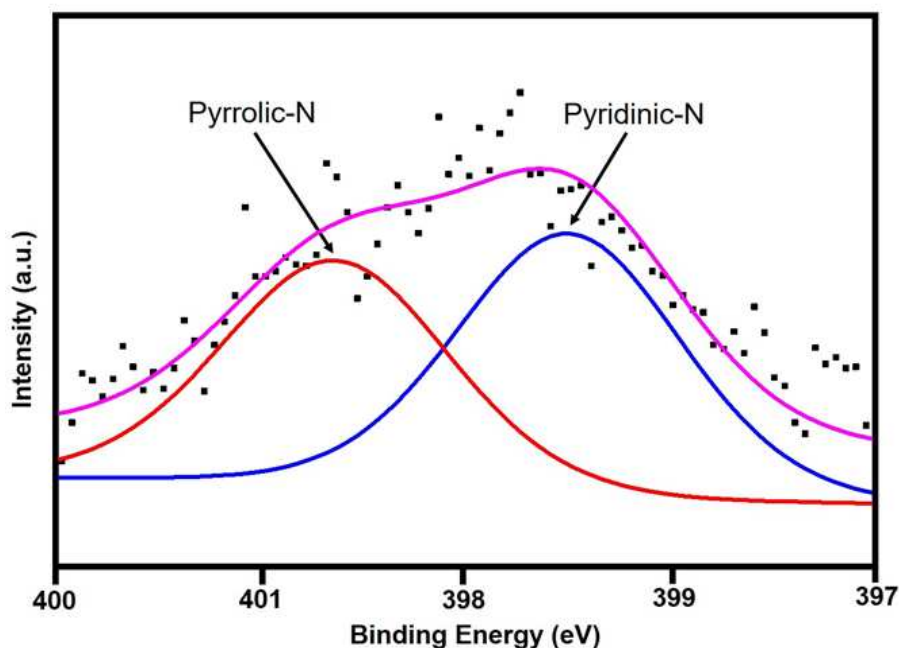

**Figure 1** Optimum concentration (0.4 g, comparatively lower than previously reported *i.e.* 0.5 g) of Melamine depicts enhanced ratio of pyrrolic ‘N’ to pyridinic ‘N’, eventually leads to synthesis of more graphitic ‘N’.

**ESI 2:**

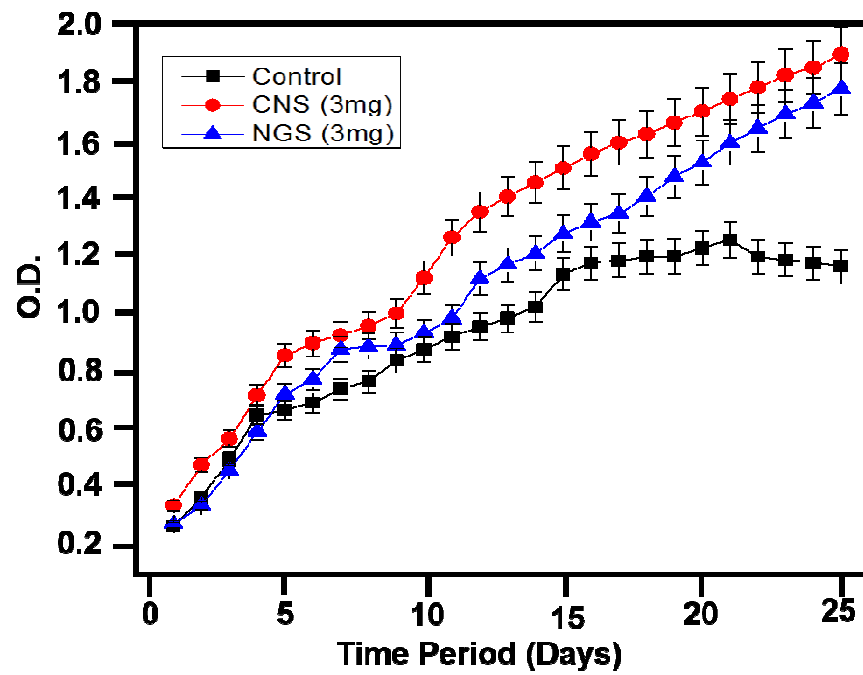

**Figure 2** Prolonged growth pattern of Control, CNS and NGS.
